# Supplementary material for: Decoration of Polyfluorene-Wrapped Carbon Nanotubes with Photocleavable Side-Chains
Source: MDPI journal article supplement (doi:10.3390/molecules28031471), 2023-02-03
Supplement: s1 [file s1]

## SUPPORTING INFORMATION

Decoration of polyfluorene-wrapped carbon nanotubes using photocleavable  
cleavable side chains

Dalia Ritaine, Alex Adronov\*

*Department of Chemistry and Chemical Biology and the Brockhouse Institute for Materials Research,  
McMaster University, 1280 Main St. W., Hamilton, Ontario, Canada L8S 4M1*

## Experimental

### Synthetic procedures

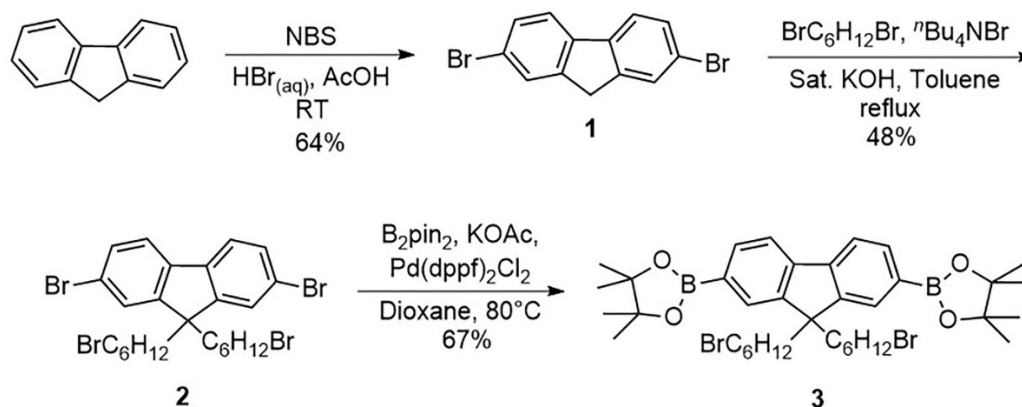

**Scheme S1:** Synthesis of monomers **2** and **3** [1].

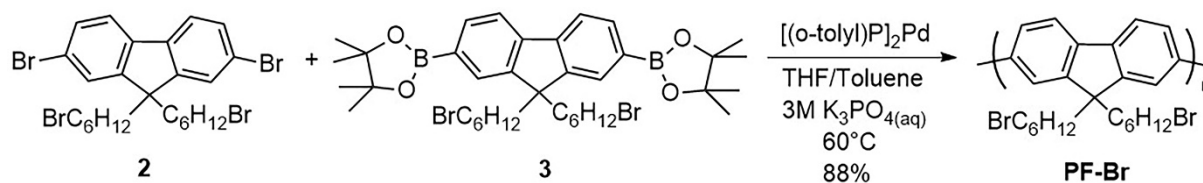

**Scheme S2:** Synthesis of **PF-Br** [1].

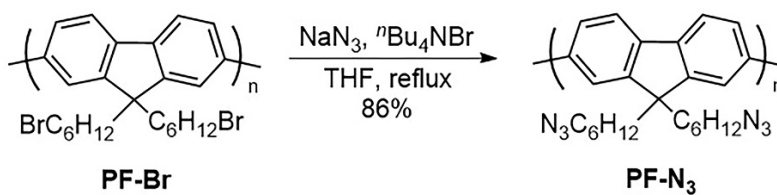

**Scheme S3:** Synthesis of **PF-N<sub>3</sub>** [1].

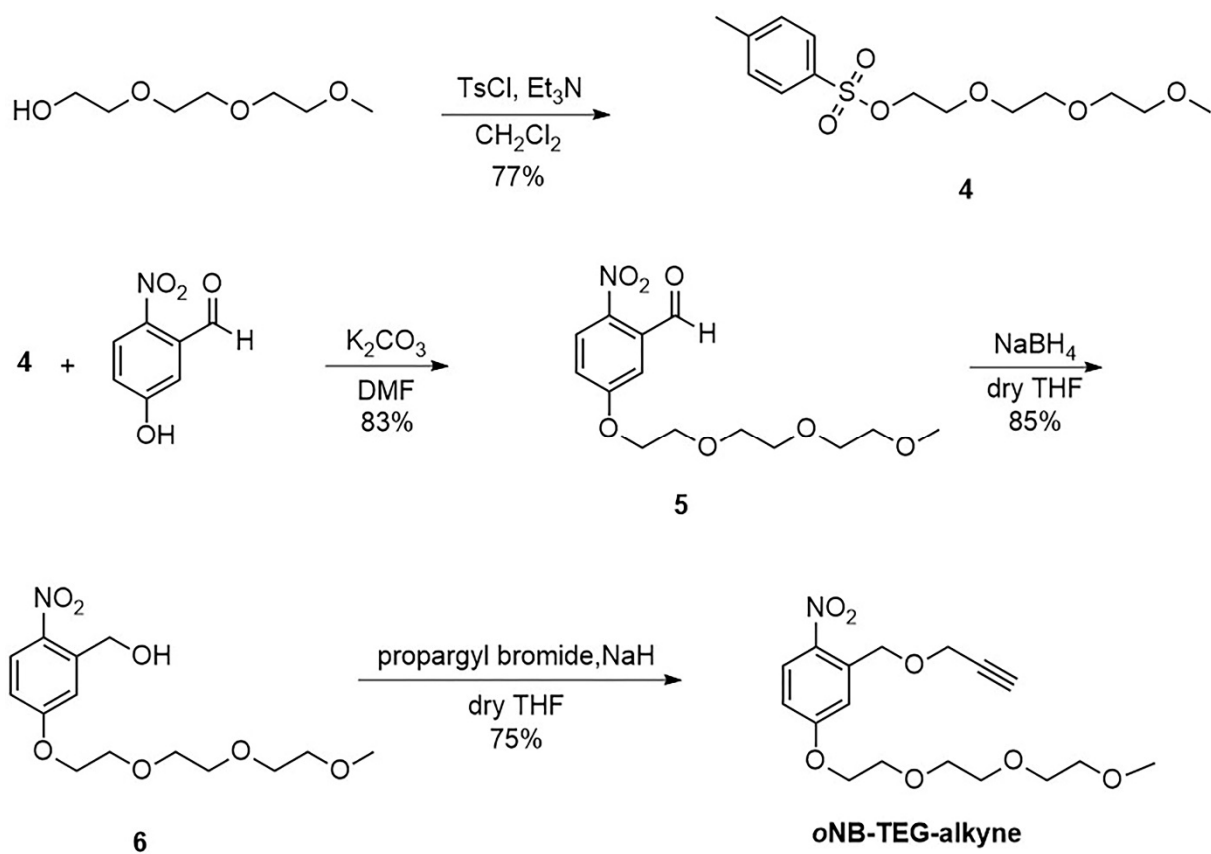

**Scheme S4:** Synthesis of **oNB-TEG-alkyne** [2,3].

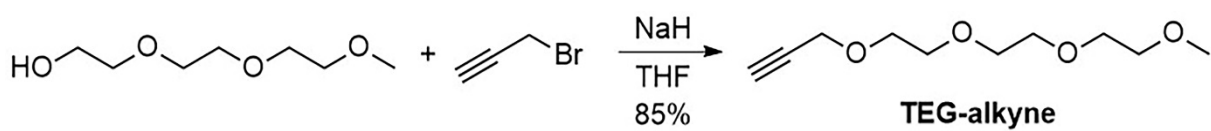

**Scheme S5:** Synthesis of **TEG-alkyne** [4].

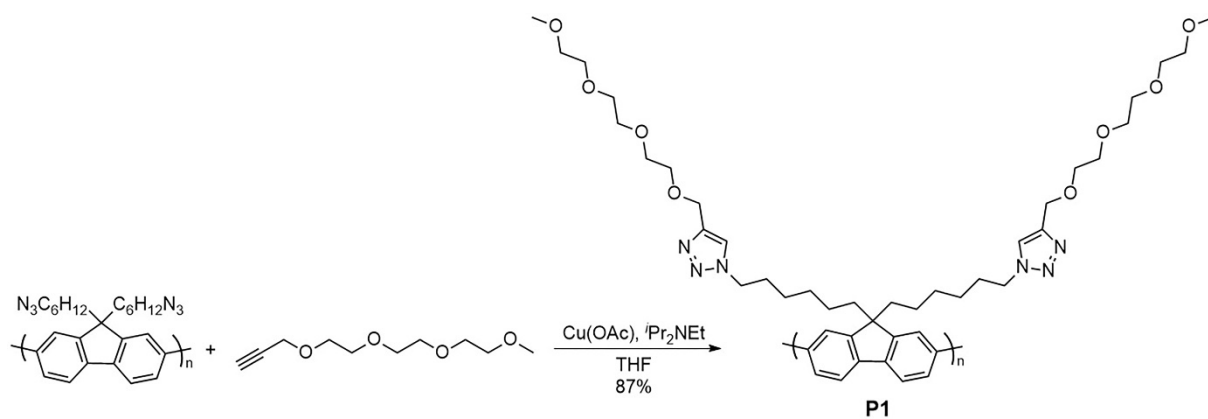

**Scheme S6: Synthesis of PF-TEG (P1).**

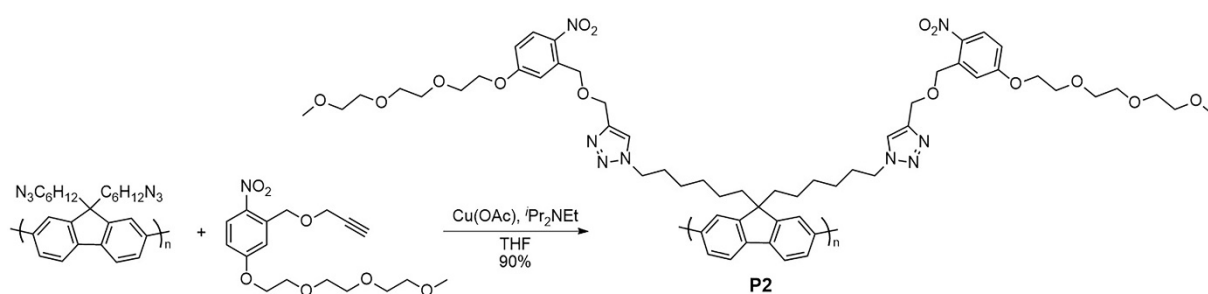

**Scheme S7: Synthesis of PF-oNB-TEG (P2).**

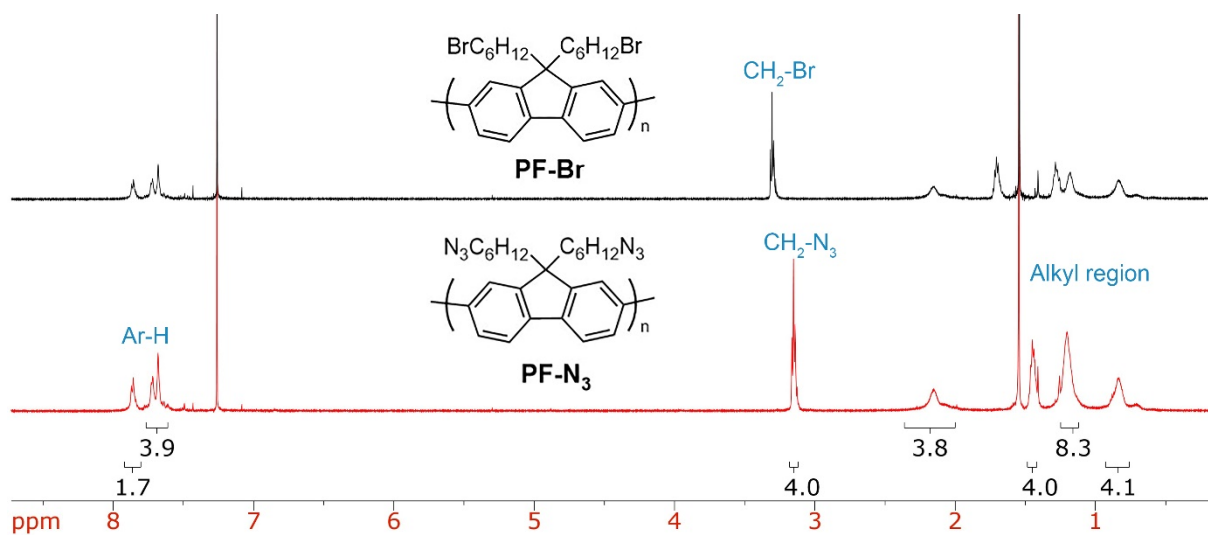

**Figure S1.  $^1\text{H}$  NMR overlay of PF-Br (top) and PF- $\text{N}_3$  (bottom).**

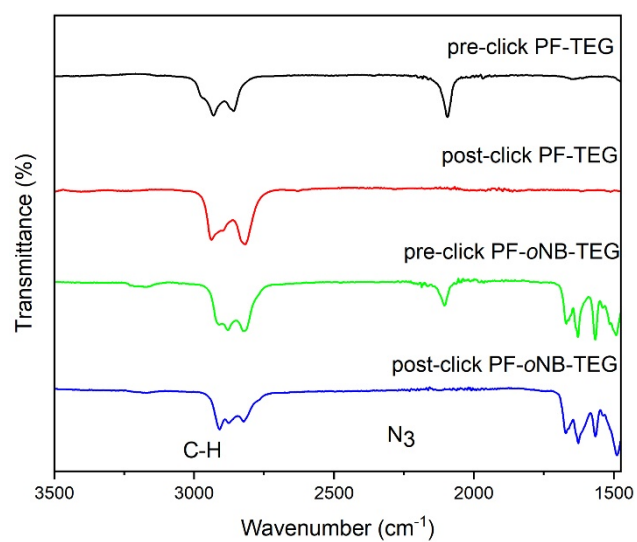

**Figure S2.** FT-IR overlay of the click reaction between **PF-N<sub>3</sub>**, TEG-alkyne and oNB-TEG-alkyne.

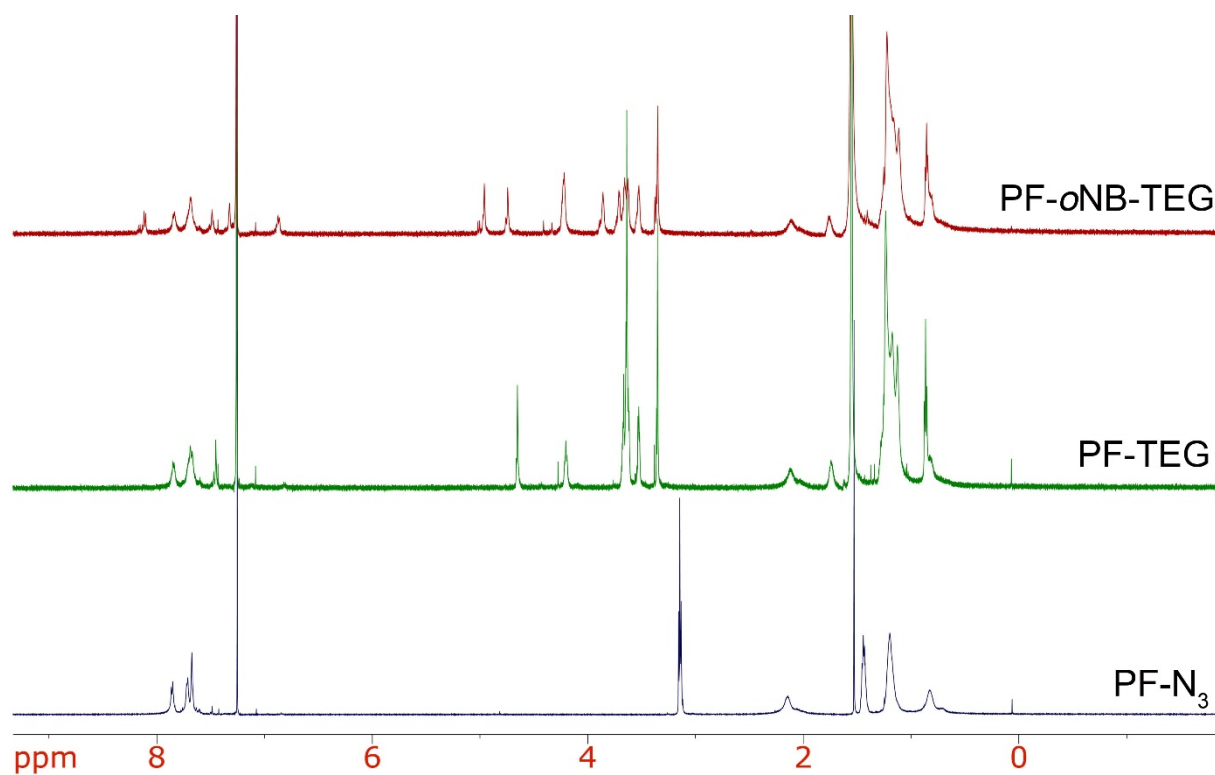

**Figure S3:** <sup>1</sup>H NMR overlay of **PF-N<sub>3</sub>** (bottom), **PF-TEG** (middle) and **PF-oNB-TEG** (top).

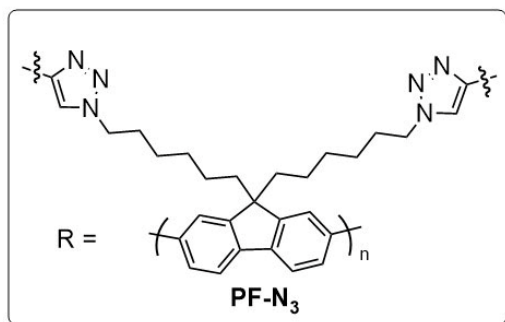

**Figure S4:** Photoisomerization mechanism of **PF-oNB-TEG**. Adapted from reference [2]

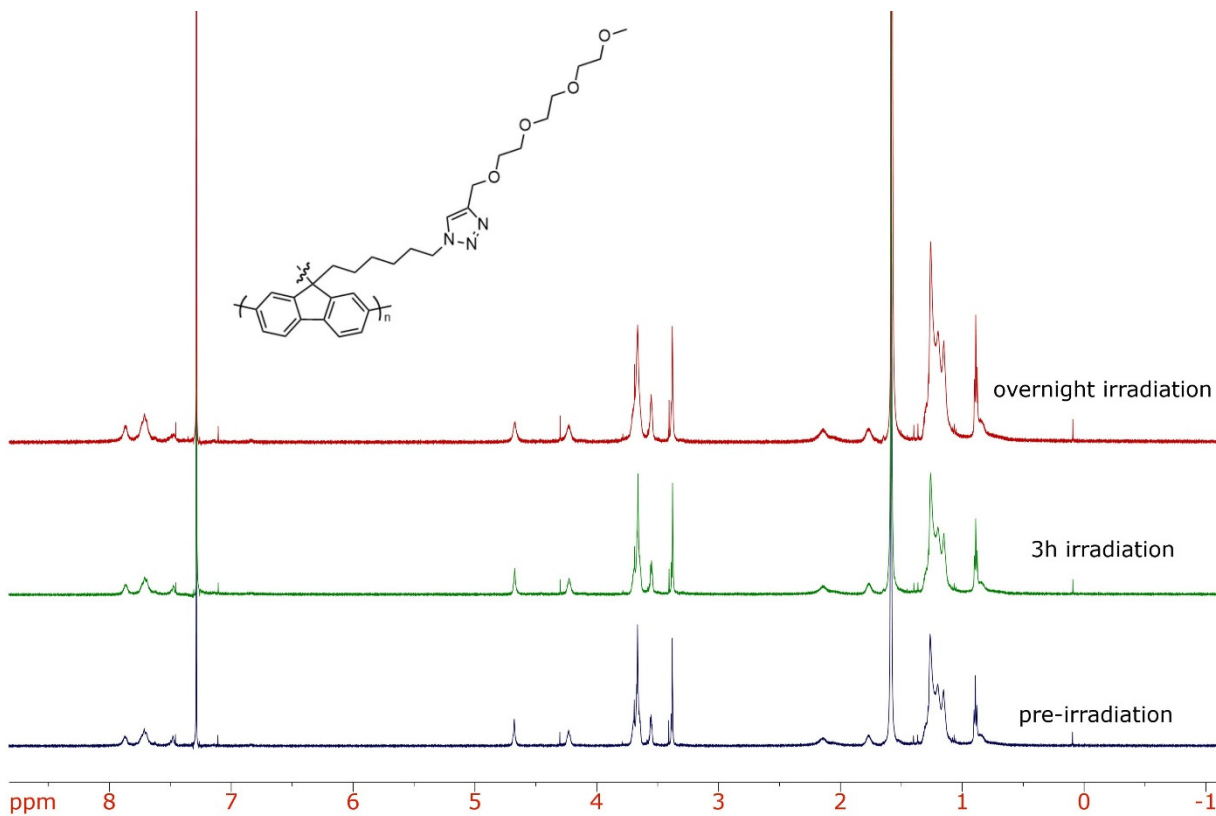

**Figure S5.**  $^1\text{H}$  NMR overlay of **PF-TEG** before irradiation (bottom), after 3 hours of irradiation (middle) and after overnight irradiation (top).

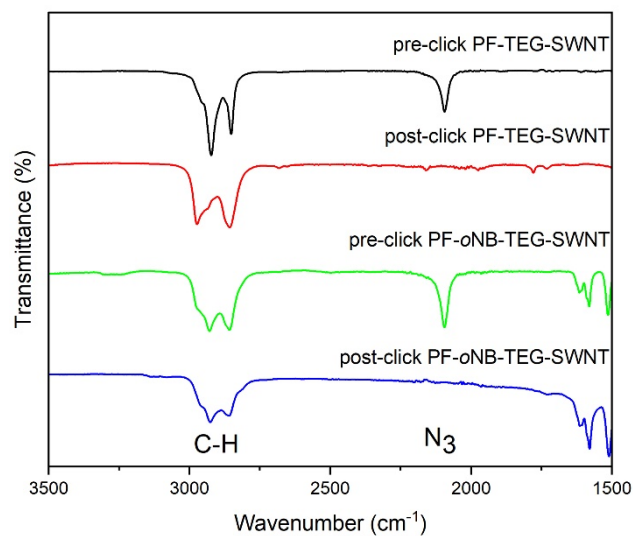

**Figure S6.** FT-IR overlay of the click reaction between the **PF-N<sub>3</sub>-SWNT** complex, TEG-alkyne and oNB-TEG-alkyne.

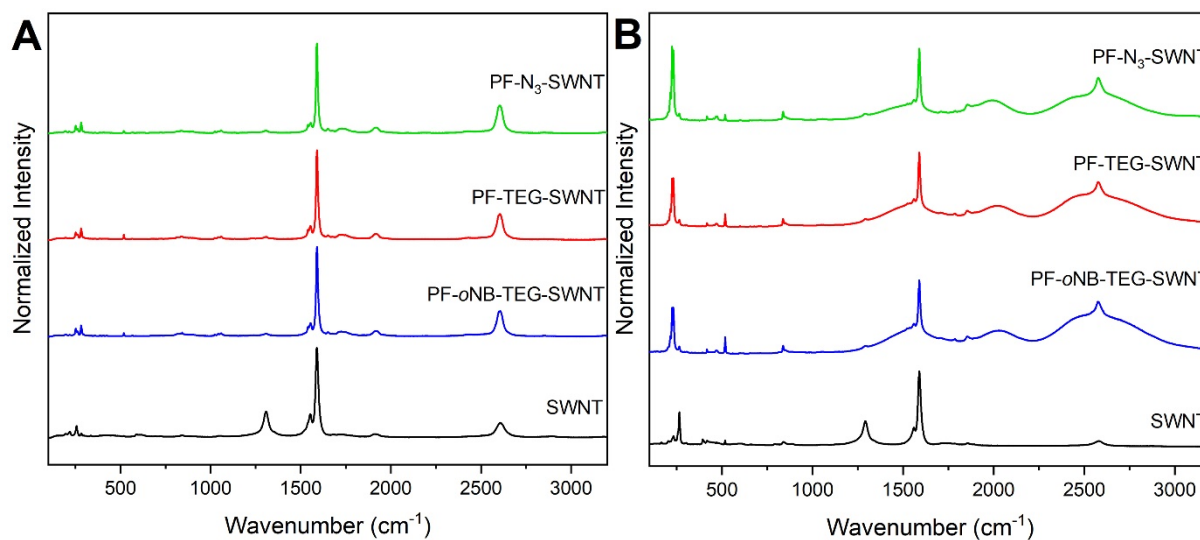

**Figure S7:** Full Raman spectra for HipCo polymer-SWNT samples at A)  $\lambda_{\text{ex}} = 633$  nm, B)  $\lambda_{\text{ex}} = 785$  nm. All the spectra were normalized at  $\sim 1590$   $\text{cm}^{-1}$ .

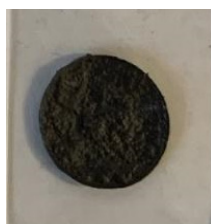

**Figure S8.** Photograph of a **PF-SWNT** thin film.

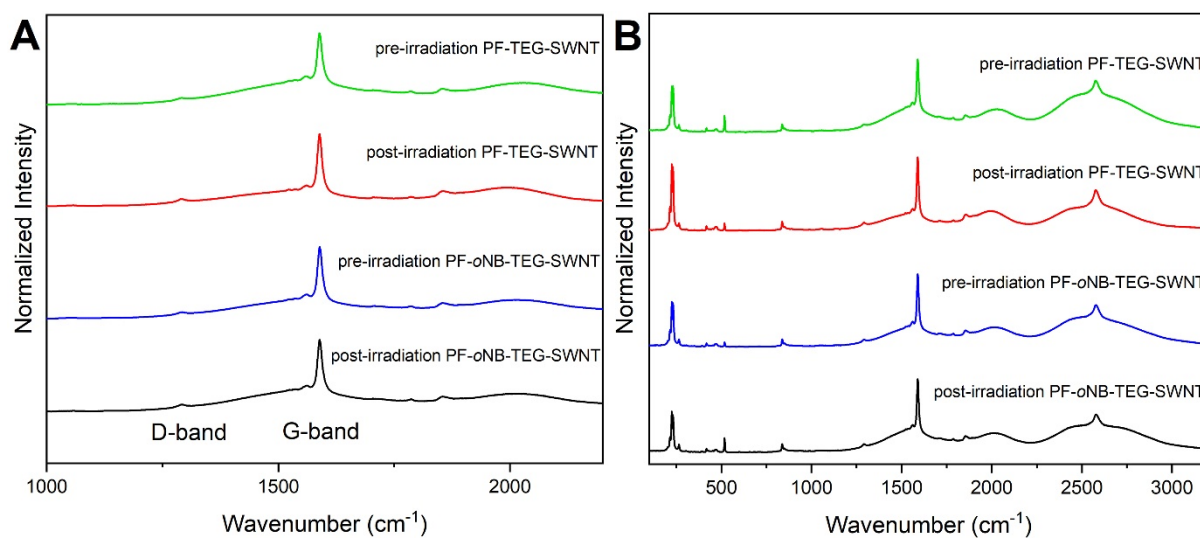

**Figure S9.** Full Raman spectra for **PF-TEG-SWNT** and **PF-oNB-TEG-SWNT** pre- and post-irradiation at A)  $\lambda_{\text{ex}} = 785$  nm. All the spectra were normalized at  $\sim 1590$   $\text{cm}^{-1}$ .

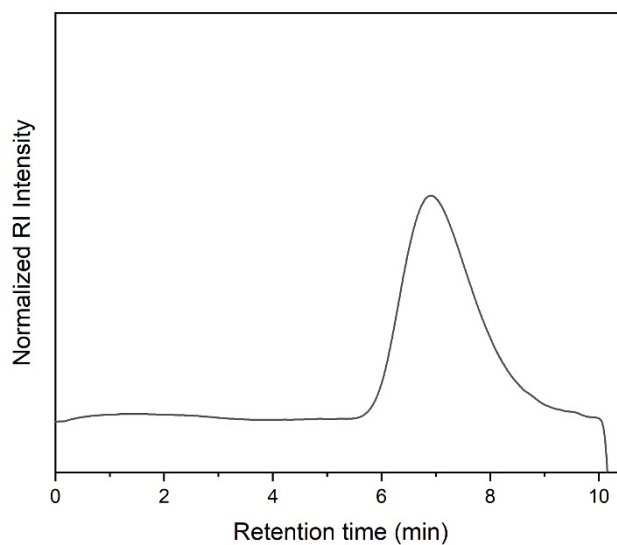

**Figure S10.** GPC trace of **PF-Br**.



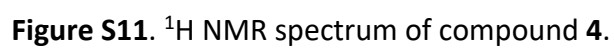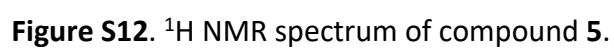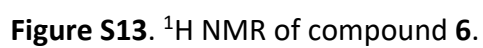

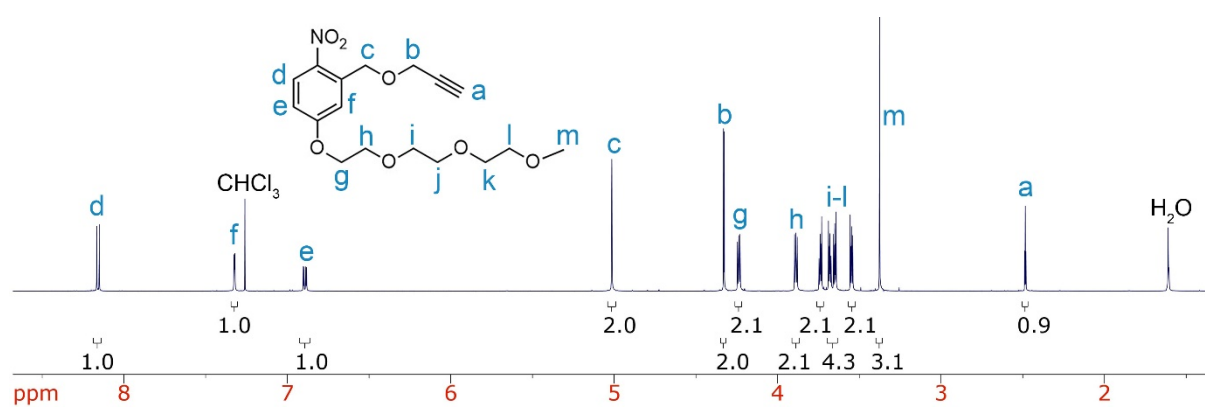

**Figure S14a.** <sup>1</sup>H NMR spectrum of **oNB-TEG-alkyne**.

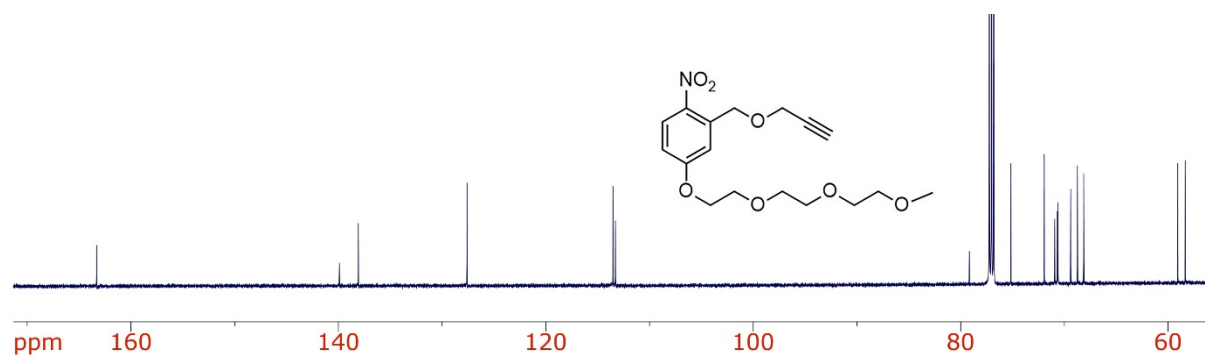

**Figure S14b.** <sup>13</sup>C NMR spectrum of compound **oNB-TEG-alkyne** in CDCl<sub>3</sub>.

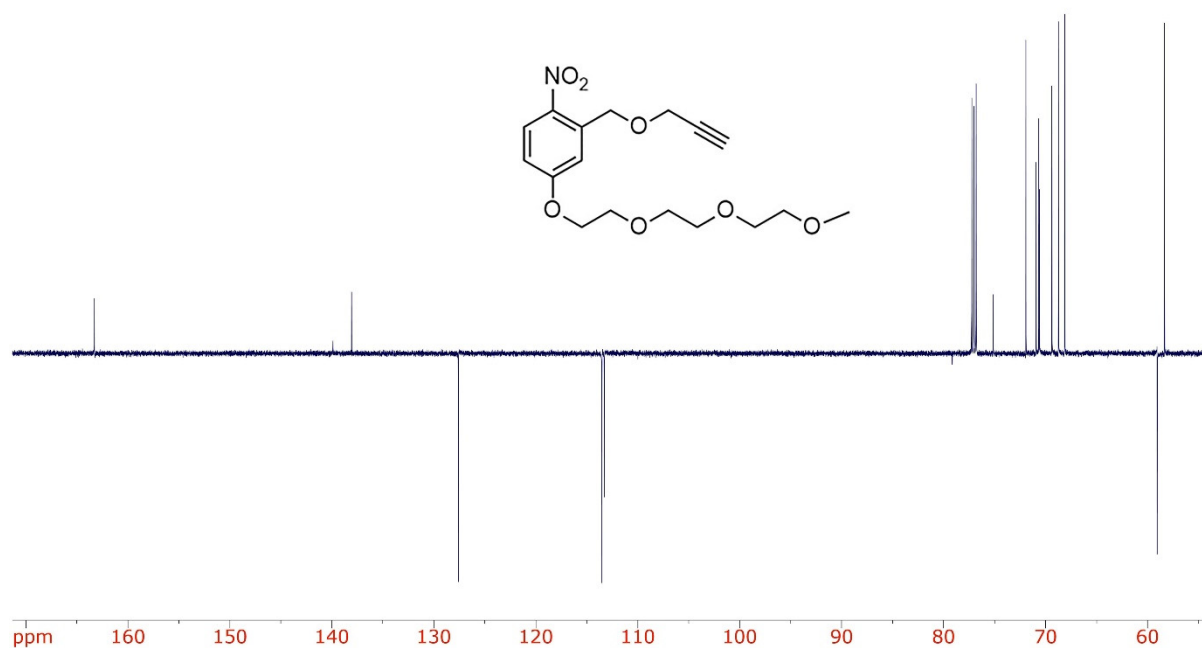

**Figure S14c.** DEPT NMR of compound **oNB-TEG-alkyne**  $\text{CDCl}_3$ .

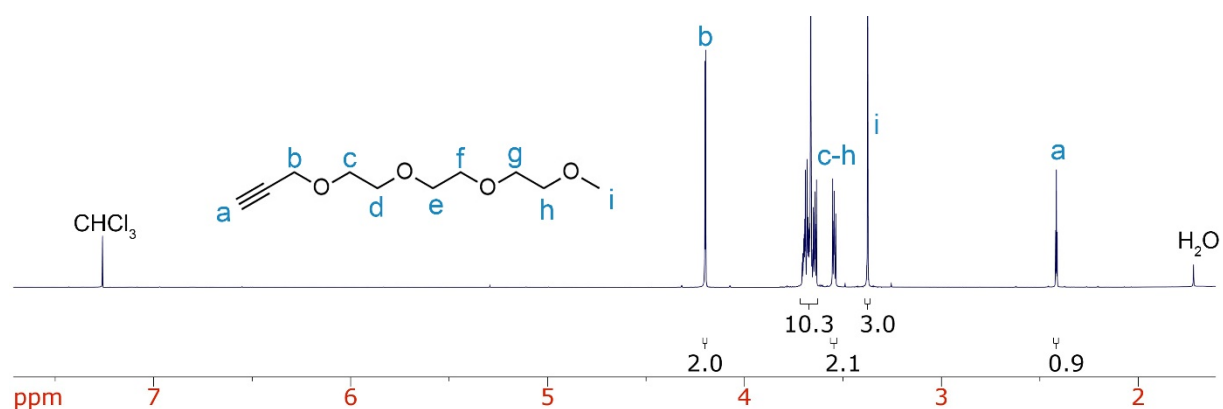

**Figure S15.**  $^1\text{H}$  NMR spectrum of **TEG-alkyne**.

1. Fong, D.; Yeung, J.; Meichsner, E.; Adronov, A. Reactive, Aqueous-Dispersible Polyfluorene-Wrapped Carbon Nanotubes Modulated with an Acidochromic Switch via Azide-Alkyne Cycloaddition. *ACS Appl. Polym. Mater.* **2019**, *1*, 797–803, doi:10.1021/acsapm.9b00040.
2. Chan, E.W.C.; Baek, P.; Tan, S.M.; Davidson, S.J.; Barker, D.; Travas-Sejdic, J. Molecular “Building Block” and “Side Chain Engineering”: Approach to Synthesis of Multifunctional and Soluble Poly(Pyrrole Phenylene)s. *Macromol. Rapid Commun.* **2019**, *40*, 1–6, doi:10.1002/marc.201800749.
3. Suzuki, Y.; Sakamoto, T.; Yoshio, M.; Kato, T. Development of Functional Nanoporous

Membranes Based on Photocleavable Columnar Liquid Crystals – Selective Adsorption of Ionic Dyes. *Eur. Polym. J.* **2020**, *134*, 109859, doi:10.1016/j.eurpolymj.2020.109859.

4. Chandra, P.; Jonas, A.M.; Fernandes, A.E. Sequence and Surface Confinement Direct Cooperativity in Catalytic Precision Oligomers. *J. Am. Chem. Soc.* **2018**, *140*, 5179–5184, doi:10.1021/jacs.8b00872.
